# Supplementary material for: Cryo-EM analyses unveil details of mechanism and targocil-II mediated inhibition of S. aureus WTA transporter TarGH
Source: Springer Nature journal article supplement (doi:10.1038/s41467-025-58202-w), 2025-04-04
Supplement: MOESM1 [file 41467_2025_58202_MOESM1_ESM.pdf]

## Supplementary Materials for

**Cryo-EM analyses unveil details of mechanism and targocil-II mediated inhibition of *S. aureus* WTA transporter TarGH**

Li, F.K.K. *et al.*

\*Corresponding author. Email: [ncjs@mail.ubc.ca](mailto:ncjs@mail.ubc.ca)

### **This PDF file includes:**

Supplementary Tables 1 to 2

Supplementary Figs. 1 to 9

|                                           |                             |                             |                             |                            |                            |
|-------------------------------------------|-----------------------------|-----------------------------|-----------------------------|----------------------------|----------------------------|
| <b>Protein conformation:</b>              | TarGH D-loop <sub>OFF</sub> | TarGH D-loop <sub>OFF</sub> | TarGH D-loop <sub>OFF</sub> | TarGH D-loop <sub>ON</sub> | TarGH D-loop <sub>ON</sub> |
| <b>Ligands:</b>                           | ATPyS                       | ATPyS                       | ATPyS + targocil-II         | ATPyS + targocil-II        | AMP-PNP + targocil-II      |
| <b>Expression Source:</b>                 | <i>E. coli</i> produced     | <i>L. lactis</i> produced   | <i>L. lactis</i> produced   | <i>L. lactis</i> produced  | <i>L. lactis</i> produced  |
| <b>Accession codes:</b>                   | EMBD-45550<br>PDB: 9CFL     | EMBD-48274<br>PDB: 9MHD     | EMBD-48282<br>PDB: 9MHZ     | EMBD-48281<br>PDB: 9MHU    | EMBD-45554<br>PDB: 9CFP    |
| <b>Data collection and processing</b>     |                             |                             |                             |                            |                            |
| Collection location                       | PNCC                        | HRMEM                       | HRMEM                       | HRMEM                      | PNCC                       |
| Microscope                                | TF Krios G3                 | TF Krios G2                 | TF Krios G2                 | TF Krios G2                | TF Krios G3                |
| Camera                                    | Gatan K3                    | Falcon 4i                   | Falcon 4                    | Falcon 4i                  | Gatan K3                   |
| Voltage (kV)                              | 300                         | 300                         | 300                         | 300                        | 300                        |
| Defocus range (μm)                        | 0.5-2.0                     | 0.5-2.0                     | 0.5-2.0                     | 0.5-2.0                    | 0.5-2.0                    |
| Movies                                    | 6,639                       | 8,888                       | 23,286                      | 23,286                     | 37,847                     |
| Physical pixel size (Å)                   | 0.53                        | 0.59                        | 0.59                        | 0.59                       | 0.53                       |
| Total dose (e-/Å <sup>2</sup> )           | 50                          | 50                          | 50                          | 50                         | 50                         |
| Symmetry imposed                          | C2                          | C2                          | C2                          | C2                         | C2                         |
| Particles initial / final                 | 2,906,596 / 153,452         | 696,797 / 61,002            | 2,331,724 / 121,566         | 2,331,724 / 113,338        | 6,924,662 / 117,415        |
| Map resolution (Å)                        | 2.3                         | 2.9                         | 2.7                         | 3.0                        | 2.9                        |
| FSC threshold                             | 0.143                       | 0.143                       | 0.143                       | 0.143                      | 0.143                      |
| <b>Model Refinements</b>                  |                             |                             |                             |                            |                            |
| Initial model used (PDB code)             | 6JBH                        | 9CFL                        | 9CFL                        | 9CFL                       | 9CFL                       |
| Model resolution (Å)                      | 2.5                         | 3.3                         | 2.9                         | 3.3                        | 3.2                        |
| FSC threshold                             | 0.5                         | 0.5                         | 0.5                         | 0.5                        | 0.5                        |
| Map sharpening B-factor (Å <sup>2</sup> ) | -88.1                       | -97.3                       | -88.8                       | -108.9                     | -103.3                     |
| <b>Model composition</b>                  |                             |                             |                             |                            |                            |
| Non-hydrogen atoms                        | 8925                        | 8923                        | 8924                        | 8786                       | 8806                       |
| Protein                                   | 1068                        | 1038                        | 1068                        | 1068                       | 1068                       |
| Ligands                                   | 7                           | 7                           | 8                           | 6                          | 6                          |
| Mean Model B-factors (Å <sup>2</sup> )    |                             |                             |                             |                            |                            |
| Protein                                   | 43.08                       | 62.74                       | 46.41                       | 52.61                      | 61.50                      |
| Ligand                                    | 55.68                       | 76.09                       | 54.07                       | 45.32                      | 59.06                      |
| R.m.s. deviations                         |                             |                             |                             |                            |                            |
| Bond lengths (Å)                          | 0.008                       | 0.003                       | 0.005                       | 0.005                      | 0.003                      |
| Bond angles (°)                           | 1.421                       | 0.499                       | 0.718                       | 0.653                      | 0.520                      |
| Validation                                |                             |                             |                             |                            |                            |
| MolProbity score                          | 1.61                        | 1.76                        | 1.74                        | 1.96                       | 1.80                       |
| All-atom clash score                      | 3.76                        | 4.37                        | 3.28                        | 6.85                       | 4.25                       |
| Rotamer outliers (%)                      | 3.83                        | 4.36                        | 4.15                        | 3.16                       | 4.14                       |
| C-beta deviations (%)                     | 0.20                        | 0.00                        | 0.00                        | 0.00                       | 0.00                       |
| Ramachandran plot                         |                             |                             |                             |                            |                            |
| Favoured (%)                              | 98.87                       | 97.74                       | 97.17                       | 96.79                      | 97.37                      |
| Allowed (%)                               | 1.13                        | 2.26                        | 2.83                        | 3.21                       | 2.63                       |
| Disallowed (%)                            | 0.00                        | 0.00                        | 0.00                        | 0.00                       | 0.00                       |

**Supplementary Table 1. *S. aureus* TarGH data collection and processing statistics.**

| Probe                                                           | Forward Primer<br>(5' – 3')                                     | Reverse Primer<br>(5' – 3')                                        |
|-----------------------------------------------------------------|-----------------------------------------------------------------|--------------------------------------------------------------------|
| <b>Construct 1- pETDuet insertion</b>                           |                                                                 |                                                                    |
| MCS1- TarG (codon optimized)                                    | GTTTAACTTTAATAAGGAGATATACCATGGGCA<br>GCAGCCATCATCACCATCATCACC   | CGATTACTTTCTGTTCCGACTTAAGCATTACA<br>AAAAGTCGGCGAACTGGTCACGGTATTTTC |
| MCS2- TarH (codon optimized)                                    | GTATAAGAAGGAGATATACATATGAACGTGTCA<br>GTAAATATTAAAAATGTTACAAAG   | CTTTCGCGTGGCACCAGAGCCTCGAGTCAT<br>TTAATCACGAAGCGGCTTTTCG           |
| <b>Construct 2- Generation of pNZDual template (pNZ8048)</b>    |                                                                 |                                                                    |
| pNZ8148 MCS1/2 amplification                                    | GACTGGCTTTTATAATATGAGATAATGCCGACT<br>GTACTTTTACAGTCGGTTTTCT     | CAACACGTGCTGTAATTTGTTTAATTGCCAT<br>TTCAATTGAACGTTTCAAGCCTAGG       |
| <b>Construct 3- Generation of N-term tagged TarG in pNZ8048</b> |                                                                 |                                                                    |
| TarG (USA300)                                                   | CAGCAGCGGCCTGGTGCCGCGCGGCAGCCAT<br>ATGTCAGCAATAGGAACAGTTTTTAAAG | CTTTGGTATTTGATTACTAATACGTTTTTACAA<br>GAAGTCTGCAAATTGATCTCTATATTTTC |
| <b>Construct 4- Generation of TarGH pNZDual plasmid</b>         |                                                                 |                                                                    |
| N-term tagged TarG (USA300)                                     | CAAAATAAATTATAAGGAGGCACTCACCATGGG<br>CAGCAGCCATCATCACCATCATCAC  | CGGGGCAGGTTAGTGACATTTCTAGATTACA<br>AGAAGTCTGCAAATTGATCTCTATATTTTC  |
| TarH (USA300)                                                   | AATAAATTATAAGGAGGCACTCCATATGAACGT<br>TTCGGTAAACATTAATAAATGTAAC  | CTAATTTTGGTTCAAAGAAAGCTTTTATTTAA<br>TAACGAAGCGGGACTCATC            |

**Supplementary Table 2. Primers utilised in construct design for *E. coli* and *L. lactis* TarGH expression**

**Supplementary Fig. 1: *S. aureus* TarGH secondary structural elements and amino acid sequence alignments.** **a** Secondary structure and sequence motifs of *S. aureus* TarG and TarH. **b** Amino acid sequence alignment of transmembrane domain TarG orthologues from USA300 *S. aureus* (used in this study; Refseq ID: ABD22558.1), *Staphylococcus epidermidis* RP62A (Refseq ID: WP\_001832041.1), *Staphylococcus haemolyticus* (Refseq ID: BAE05567.1), *Staphylococcus lugdunensis* (Refseq ID: TBW71547.1),

*Alicyclobacillus herbarius* (Refseq ID: WP\_026962790.1), *Bacillus subtilis* 168 (Refseq ID: WP\_003227928.1), *Enterococcus faecalis* strain V583 (Refseq ID: AAC35925.1), *Listeria monocytogenes* (Refseq ID: HAC3253105.1). Homologous type V ABC transporter *Aquifex aeolicus* Wzm (Refseq ID: WP\_010880683) also included. Secondary structure for *S. aureus* TarG determined here shown above and key residues are indicated below as per key in box. **c** As per **b** for nucleotide binding domain TarH. USA300 *S. aureus* ((Refseq ID: Q2FJ01.1), *Staphylococcus epidermidis* RP62A (Refseq ID: WP\_001832071.1), *Staphylococcus haemolyticus* (Refseq ID: WP\_011276519.1), *Staphylococcus lugdunensis* ((Refseq ID: WP\_002461317.1), *Alicyclobacillus herbarius* TarH (Uniprot: A0A6I8WFL6), *Bacillus subtilis* 168 (Refseq ID: WP\_003227930.1), *Enterococcus faecalis* strain V583 (Refseq ID: WP\_010706558.1), *Listeria monocytogenes* (Refseq ID: HAA8326601.1), and *Aquifex aeolicus* Wzt (Refseq ID: WP\_010880682.1).

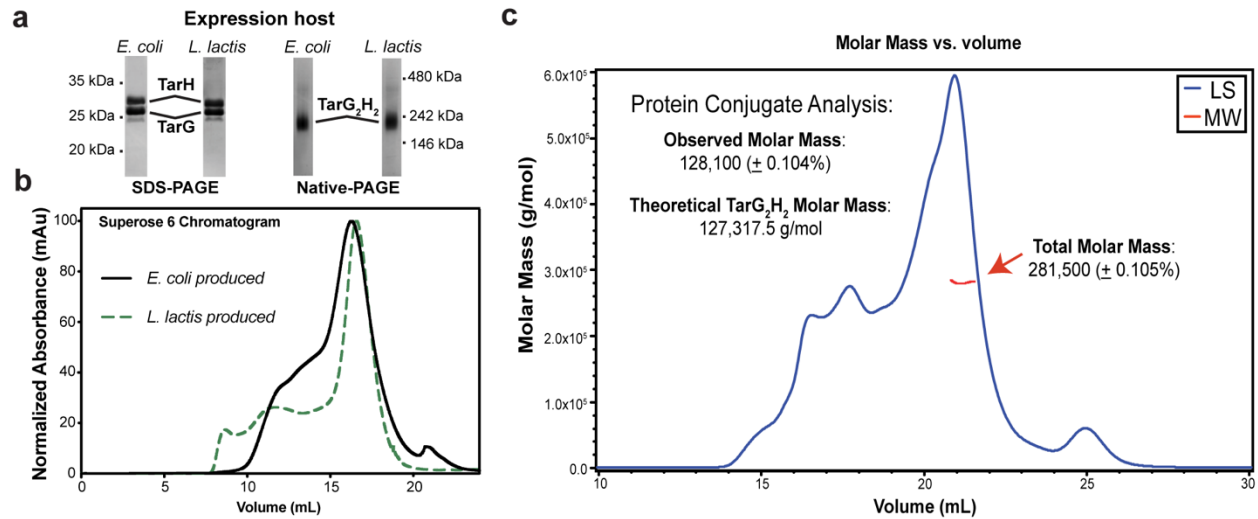

**Supplementary Fig. 2: *In vitro* characterization by poly-acrylamide gel electrophoresis (PAGE), size-exclusion chromatography, and size-exclusion chromatography tandem multi-angle light scattering (SEC-MALS) of LMNG-extracted *S. aureus* TarGH.** **a** Purity of purified *S. aureus* TarGH utilized for functional assays and cryo-EM. Sample run under denaturing (SDS-PAGE) and native (Native-PAGE) conditions. **b** Size exclusion chromatography using a Superose 6 Increase, 10/300 GL column shows *S. aureus* TarGH elutes as a single peak from either *E. coli* or *L. lactis* produced protein. **c** SEC-MALS analysis of *L. lactis* produced *S. aureus* TarGH. Protein conjugate analysis of the LMNG extracted TarGH shows a heterotetramer composed of two TarH and two TarG protomers. The chromatogram (blue line) represents light scattering with the red line indicating the molar mass (left axis). Total molar mass corresponds to the entire TarGH/LMNG complex and observed molar mass represents the detergent corrected molar mass after protein conjugate analysis was applied. A LMNG dn/dc value of 0.14 ml/g and ProtParam generated TarGH heterotetrametric extinction coefficient were used.



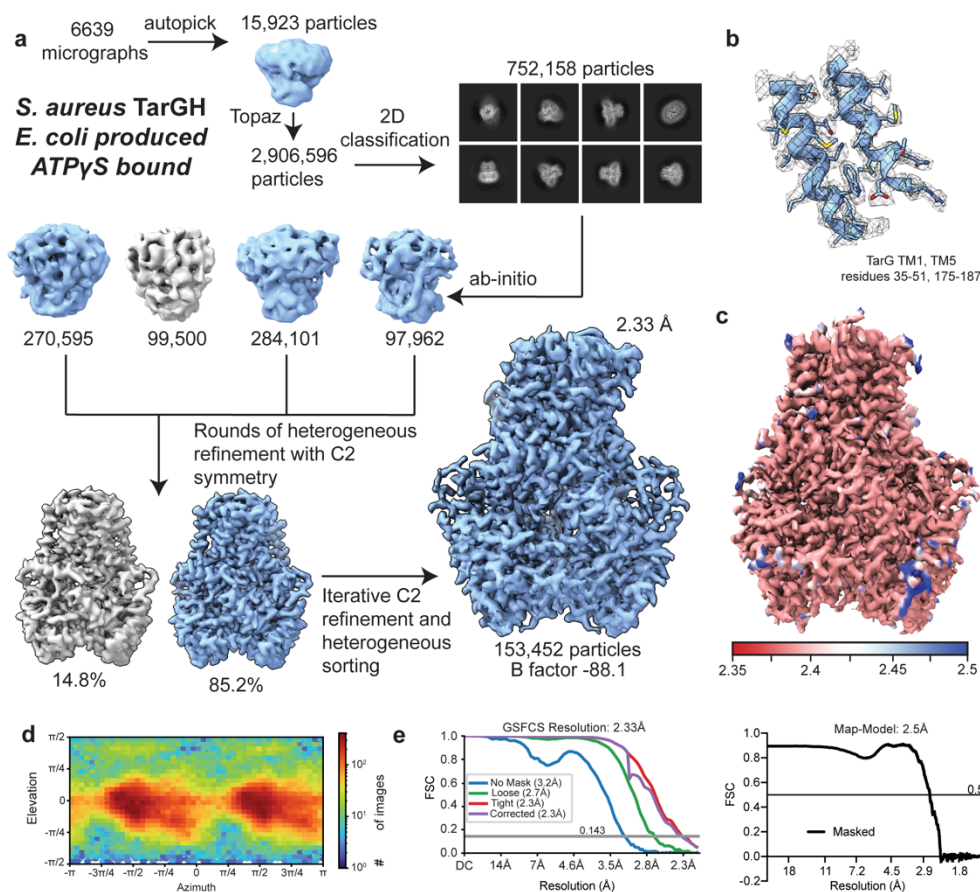

**Supplementary Fig. 3: Single particle cryo-EM data processing of *E. coli*-expressed, LMNG extracted *S. aureus* TarGH in complex with  $Mg^{2+}$  and ATPyS.** **a** Processing workflow was completed in cryoSPARC<sup>1</sup> with representative cryo-EM density maps modeled in ChimeraX<sup>2</sup>. **b** Example density for *S. aureus* TarG ATPyS-bound secondary structural elements shown in dark grey mesh (map-threshold of 0.15). **c** Cryo-EM density map as in **a** coloured by local resolution. **d** Particle orientation distribution heat map. **e** Gold-standard half-map FSC curves with 0.143 cutoff threshold. **f** Gold-standard model-map FSC curve with 0.5 FSC cutoff threshold.

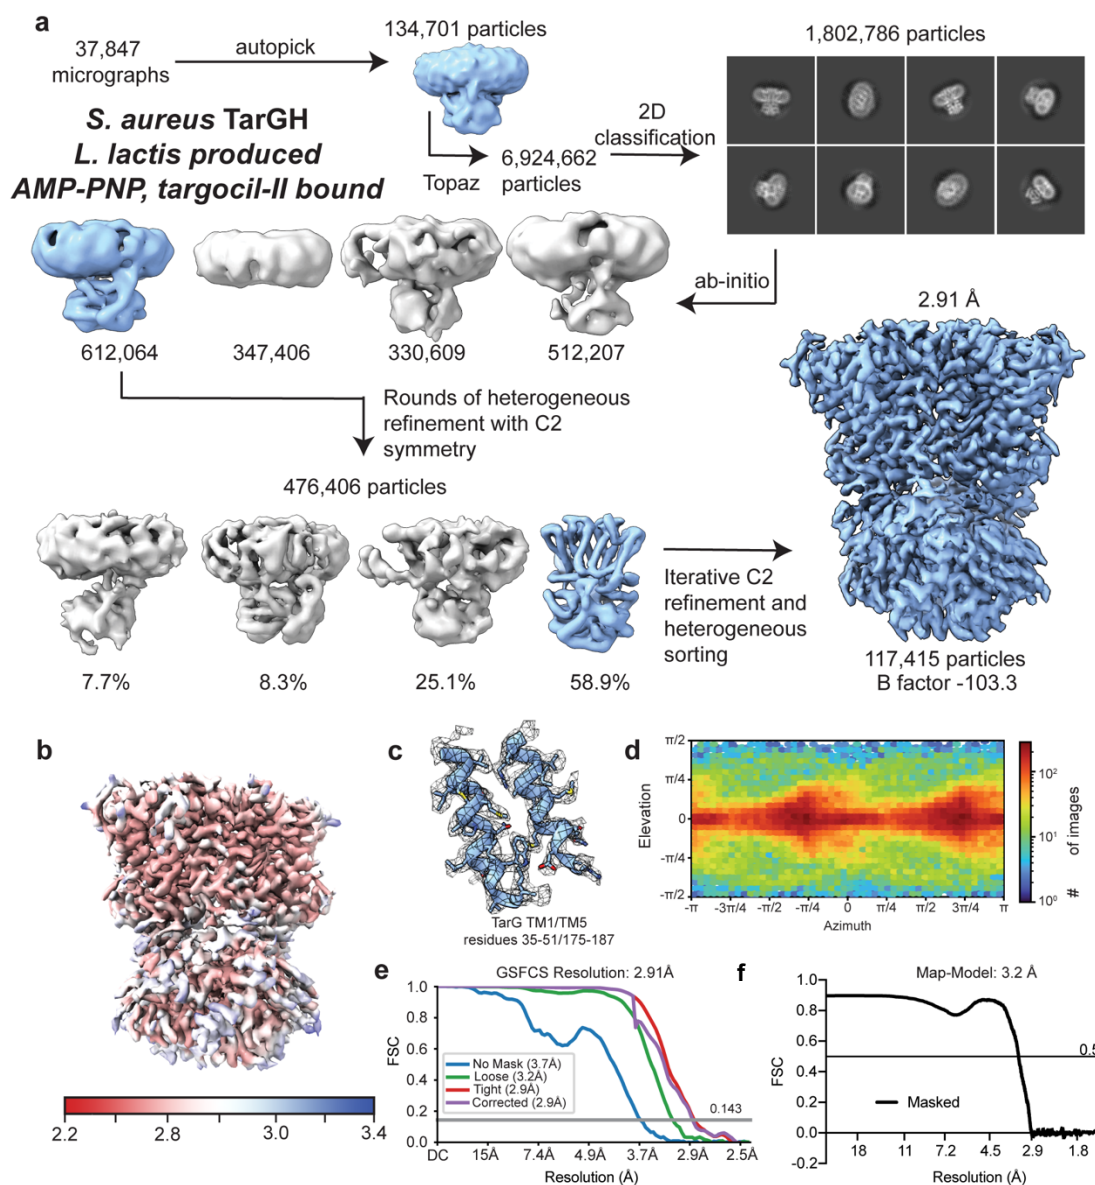

**Supplementary Fig. 4: Single particle cryo-EM data processing of *L. lactis*-expressed, LMNG extracted *S. aureus* TarGH in complex with Mg<sup>2+</sup>, AMP-PNP, and targocil-II.** **a** Processing workflow was completed in cryoSPARC<sup>1</sup> with representative cryo-EM density maps modeled in ChimeraX<sup>2</sup>. **b** Refined cryo-EM density map as in **A** colored by local resolution. **c** Example density for targocil-II inhibited *S. aureus* TarG AMP-PNP bound secondary structural elements shown in dark grey mesh (map-threshold of 0.15). **d** Particle orientation distribution heat map. **e** Gold-standard half-map FSC curves with 0.143 cutoff threshold. **f** Gold-standard model-map FSC curve with 0.5 FSC cutoff threshold.

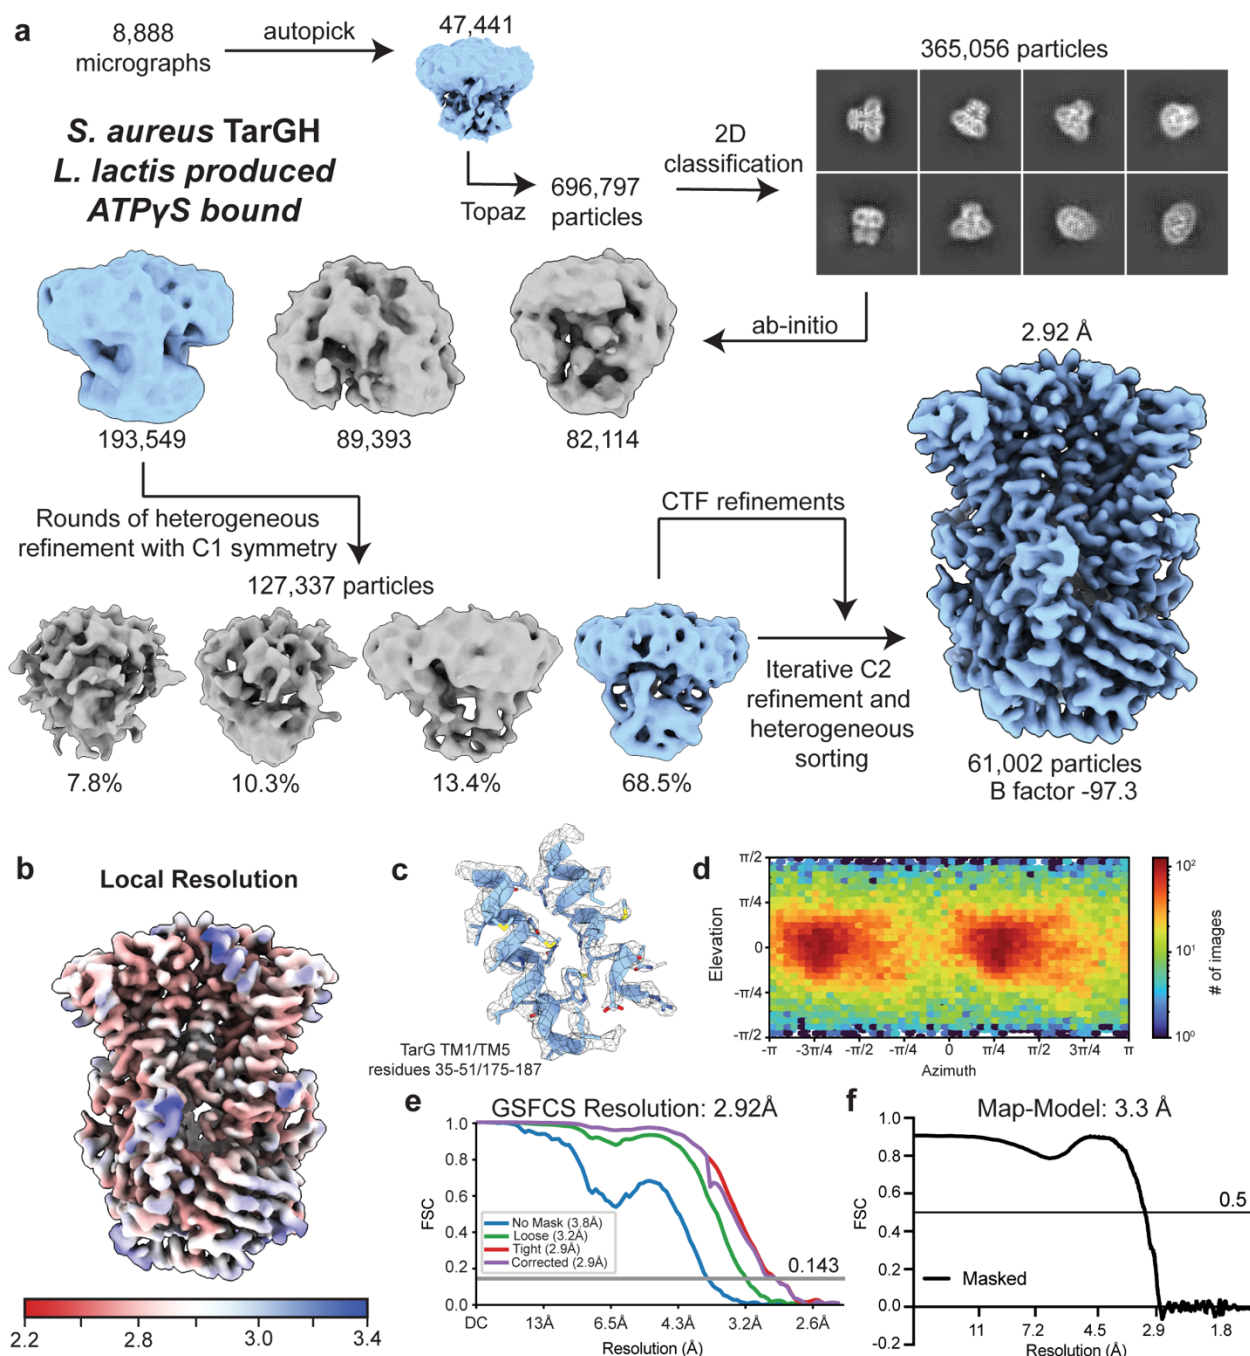

**Supplementary Fig. 5: Single particle cryo-EM data processing of *L. lactis*-expressed, LMNG extracted *S. aureus* TarGH in complex with  $\text{Mg}^{2+}$  and ATP<sub>γ</sub>S.** **a** Processing workflow was completed in cryoSPARC<sup>1</sup> with representative cryo-EM density maps modeled in ChimeraX<sup>2</sup>. **b** Refined cryo-EM density map as in **a** colored by local resolution. **c** Example density for *S. aureus* TarG ATP<sub>γ</sub>S-bound secondary structural elements shown in dark grey mesh (map-threshold of 0.15). **d** Particle orientation distribution heat map. **e** Gold-standard half-map FSC curves with 0.143 cutoff threshold. **f** Gold-standard model-map FSC curve with 0.5 FSC cutoff threshold.



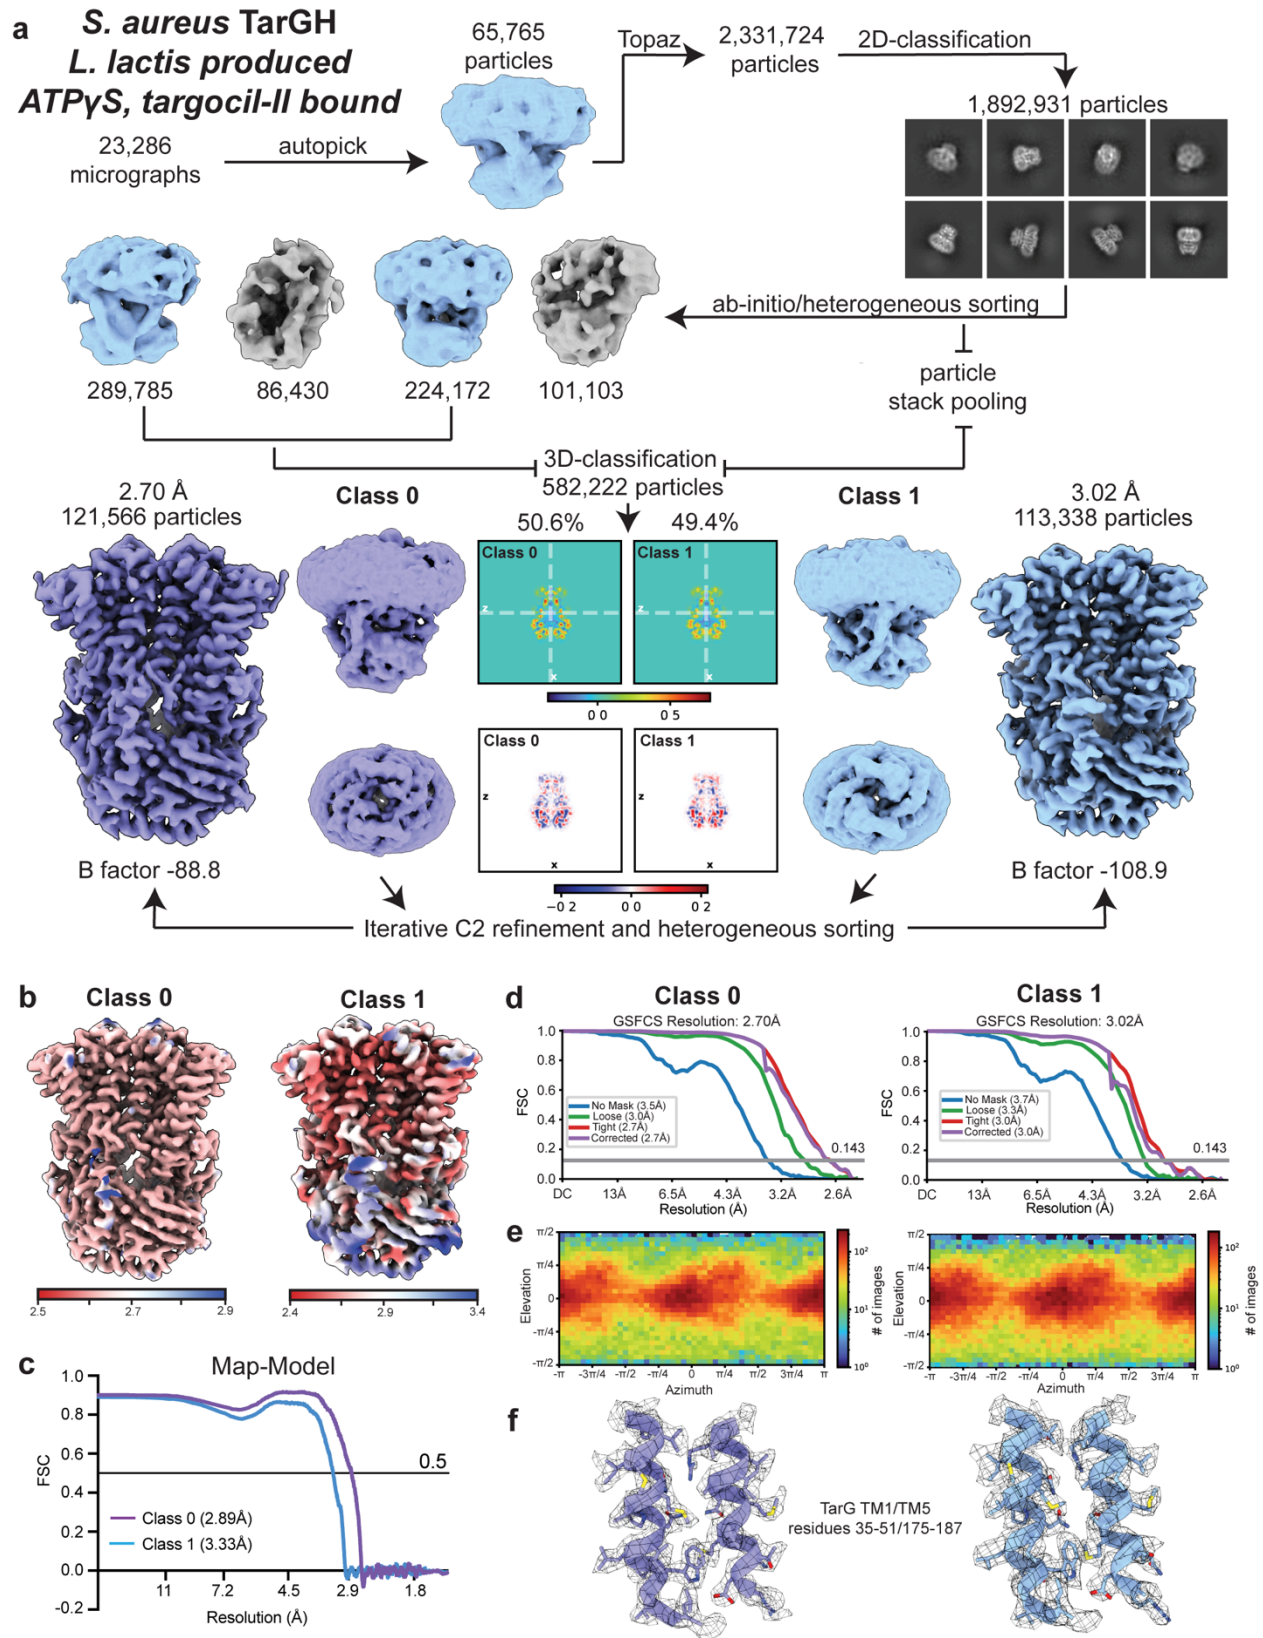

**Supplementary Fig. 6: Single particle cryo-EM data processing of *L. lactis*-expressed, LMNG extracted *S. aureus* TarGH in complex with  $Mg^{2+}$ , ATPyS, and targocil-II.** a Processing workflow was completed in cryoSPARC<sup>1</sup> with representative cryo-EM

density maps modeled in ChimeraX<sup>2</sup>. Class 0 represents the D-loop<sub>OFF</sub> conformation while Class 1 represents the D-loop<sub>ON</sub> conformation. **b** Refined cryo-EM density map as in **a** colored by local resolution from each isolated class. **c** Gold-standard half-map FSC curves with 0.143 cutoff threshold. **d** Gold-standard model-map FSC curves with 0.5 FSC cutoff threshold. **e** Particle orientation distribution heat map. **f** Example density for targocil-II inhibited *S. aureus* TarG AMP-PNP bound secondary structural elements shown in dark grey mesh (map-threshold of 0.15).

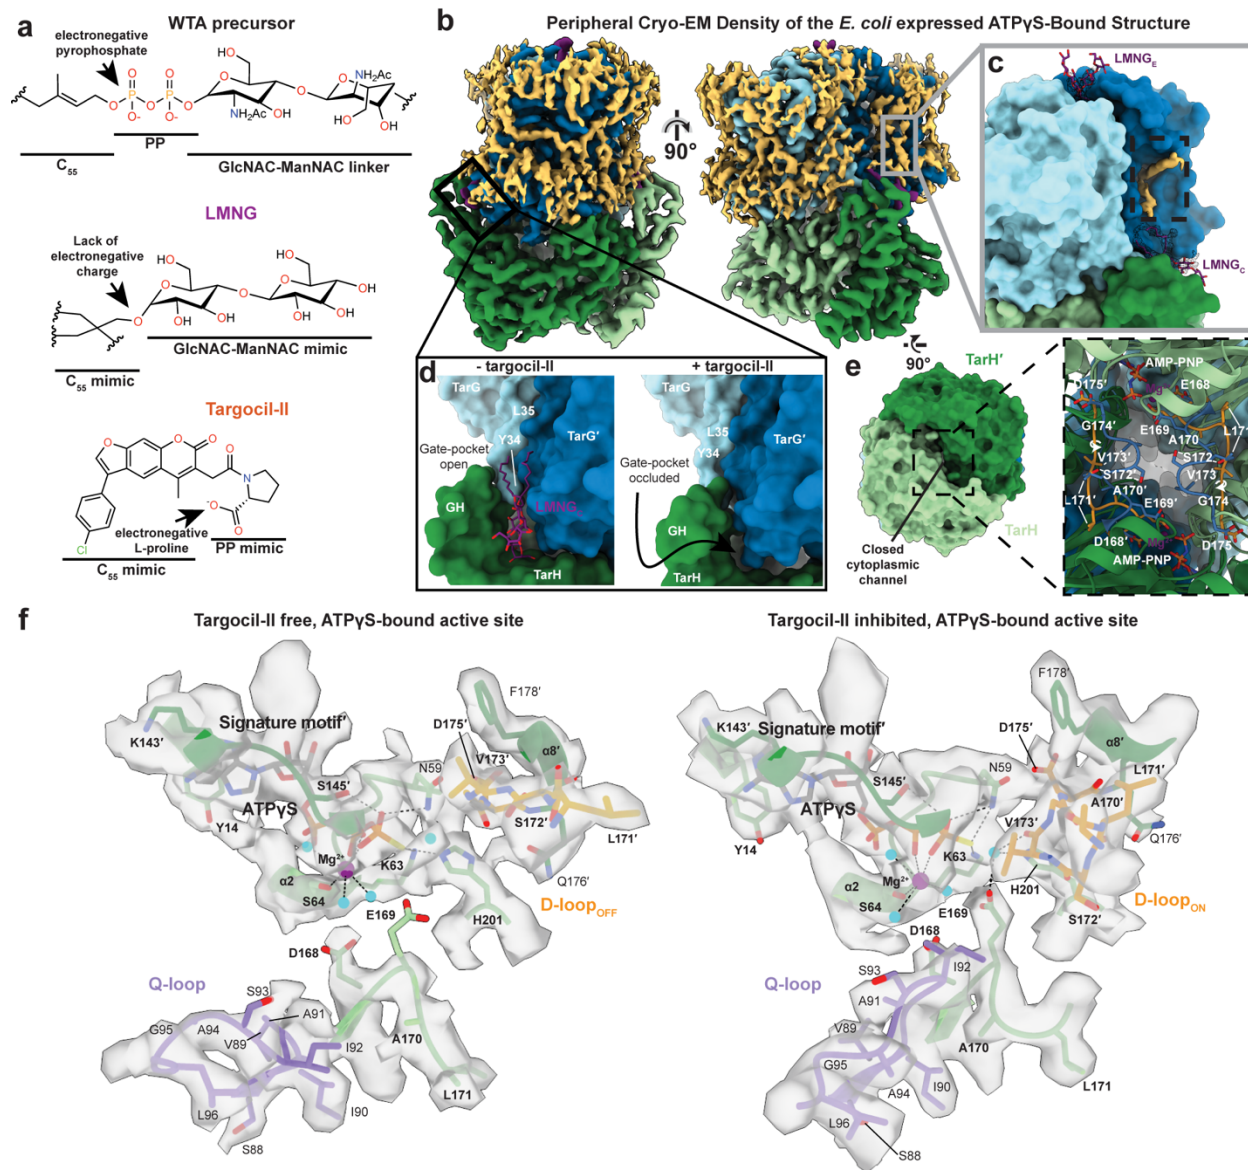



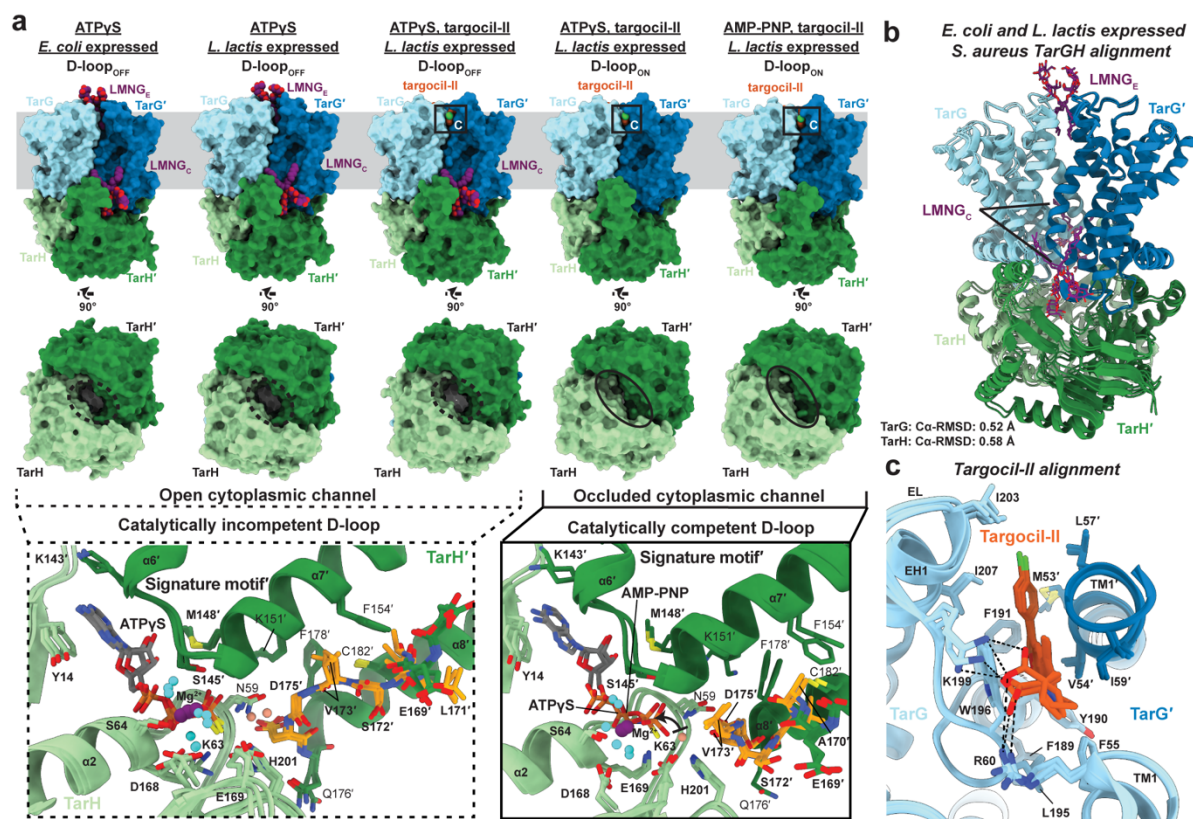

**Supplementary Fig. 8: Structural comparison of resolved TarGH structures and ligands.** **a** Surface representation of the five *S. aureus* TarGH structures determined here (top) with bound ligands (LMNG and targocil-II) shown as purple and orange spheres, respectively, with heteroatom colouring. Cytoplasmic perspective and the corresponding D-loop conformations are shown at the bottom, with the boxed-out regions showing superposed D-loop<sub>OFF</sub> (dashed) or D-loop<sub>ON</sub> (solid) active sites. TarH ABC motif residues are shown as sticks, with nucleotides (ATPyS and AMP-PNP) in grey, coordinated water molecules in cyan, catalytic water in salmon, and magnesium in purple and depicted as a sphere. The D-loop of the opposing TarH protomer is coloured orange with heteroatom colouring and represented as sticks. **b** Ribbon overlay of the *E. coli* expressed and *L. lactis* expressed *S. aureus* TarGH structures with bound LMNG shown as sticks, coloured purple with heteroatom colouring. The relative Ca RMSDs are listed below. **c** Ribbon overlay of the TarG extracellular targocil-II binding pocket from targocil-II bound TarGH with AMP-PNP (D-loop<sub>ON</sub>), ATPyS-bound (D-loop<sub>ON</sub>), and ATPyS-bound (D-loop<sub>OFF</sub>). Direct interaction of the L-proline carboxylate with R60 and K199 are shown as dashed lines with the binding pocket and interacting residues shown as sticks and coloured light/dark blue with heteroatom colouring.



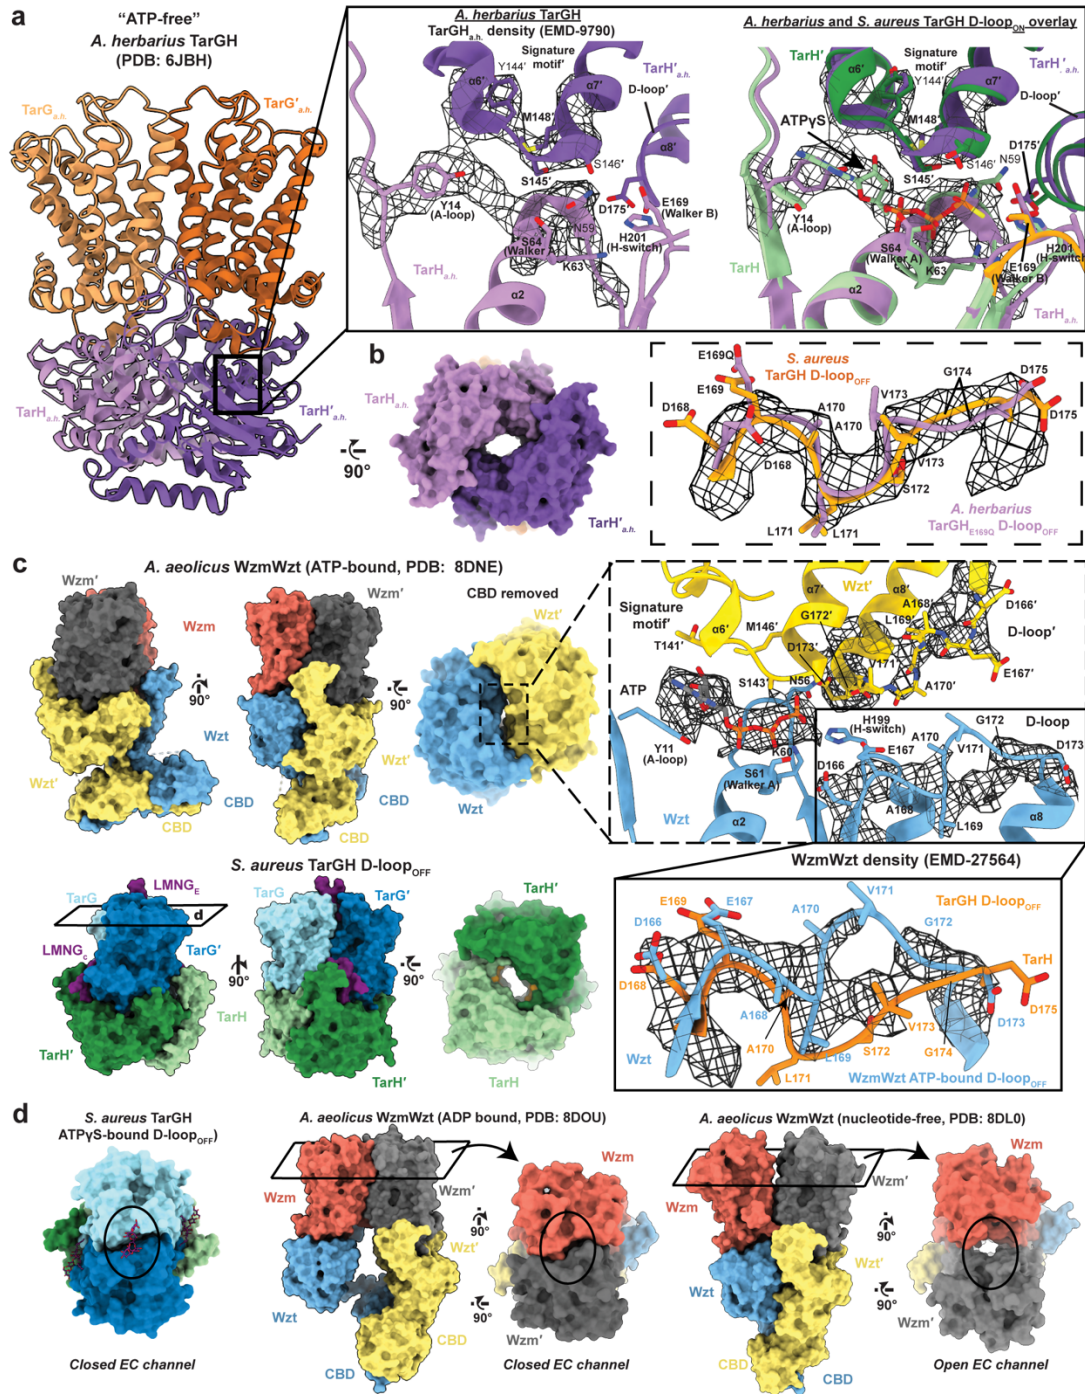

**Supplementary Fig. 9: Structural comparisons of bacterial ABC transporter Type V lipid-transferases.** **a** Cryo-EM structure of the *Alicyclobacillus herbarius* TarGH E169Q catalytically mutant<sup>3</sup> (PDB: 6JBH) shown as ribbon with TarG coloured light/dark orange and TarH coloured light/dark purple. Boxed region shows close up of the TarH active site modelled without bound nucleotide as deposited (left) with cryo-EM density (dark grey mesh; EMD-9790, map-threshold of 0.13) shown around the A-loop, signature motif, and Walker A motif. A superposed view with the ATPyS-bound TarGH D-loop<sub>OFF</sub> (green) determined here is shown on right showing the density supports a bound endogenous nucleotide, likely ATP. **b** Bottom-up view of **a** in surface representation showing similar open channel within the TarH dimer defined by the D-loop<sub>OFF</sub> conformation. Boxed region shows close up view of the D-loop from the *A. herbarius* structure (purple; corresponding cryo-EM density shown as grey mesh at a map-threshold of 0.1) and ATPyS-bound TarGH D-loop<sub>OFF</sub> determined here (gold). **c** Comparison of the ATPyS-bound TarGH D-loop<sub>OFF</sub> structure (bottom) with the *Aquifex aeolicus* WzmWzt ATP-bound structure<sup>4</sup> (top) determined from a sample undergoing ATP hydrolysis (incubated with ATP for one hour prior to freezing). View in solid box shows close up of Wzt NBD active site dimer with cryo-EM density shown in grey mesh (EMD-27564, map-threshold of 0.18). Dashed box further highlights the modelled D-loop conformation (blue) with supporting density at the same threshold. The D-loop<sub>OFF</sub> from the ATPyS-bound TarGH structure is overlaid in orange suggesting both the D-loop<sub>ON</sub> (as

modelled) and D-loop<sub>OFF</sub> conformations are likely present in this active sample. **d** Conformational variability within the transmembrane Wzm domains. The *S. aureus* TarGH ATP<sub>S</sub> D-loop<sub>OFF</sub> structure (left), *Aquifex aeolicus* WzmWzt ADP-bound “teepee” structure (EMD-27623; middle) in an NDB splayed state of the NBDs with TMD interface open up to conserved aromatic constriction, and nucleotide-free, outward open state (EMD-27494; right) are shown as surface models with side (WzmWzt only) and extracellular perspectives. Given the structural homology between WzmWzt and TarGH, similar states likely exist and may inform substrate translocation.

#### Supplementary References:

- 1 Ali Punjani, J. L. R. D. J. F. M. A. B. cryoSPARC- algorithms for rapid unsupervised cryo-EM structure determination.pdf. *Nature Methods* **14** (2017). <https://doi.org/10.1038/nmeth.4169>*nature*
- 2 Goddard, T. D. *et al.* UCSF ChimeraX: Meeting modern challenges in visualization and analysis. *Protein Sci* **27**, 14-25 (2018). <https://doi.org/10.1002/pro.3235>
- 3 Chen, L. *et al.* Cryo-electron Microscopy Structure and Transport Mechanism of a Wall Teichoic Acid ABC Transporter. *mBio* **11** (2020). <https://doi.org/10.1128/mBio.02749-19>
- 4 Spellmon, N. *et al.* Molecular basis for polysaccharide recognition and modulated ATP hydrolysis by the O antigen ABC transporter. *Nat Commun* **13**, 5226 (2022). <https://doi.org/10.1038/s41467-022-32597-2>
